# Supplementary material for: Precipitation Variations in the Central Qilian Mountains since the 7th Century and Regional Differences: Evidence from Tree-Ring Data
Source: MDPI journal article supplement (doi:10.3390/f15040624), 2024-03-29
Supplement: s1 [file s1]

## Supplementary Materials

**Table S1.** Calibration and verification statistics of the reconstruction model.

| Calibration period |        |      |       | Verification period |      |                       |                       |      |       |       |
|--------------------|--------|------|-------|---------------------|------|-----------------------|-----------------------|------|-------|-------|
| Time span          | months | r    | F     | Time span           | r    | ST                    | FST                   | PMT  | RE    | CE    |
| 1958 ~ 2016        | P8-C7  | 0.59 | 30.0  | 1958 ~ 2016         | 0.56 | 45+/14- <sup>**</sup> | 42+/16- <sup>**</sup> | 2.76 | 0.30  | 0.30  |
|                    | P7-C6  | 0.63 | 36.6  |                     | 0.59 | 47+/12- <sup>**</sup> | 40+/18- <sup>**</sup> | 2.8  | 0.35  | 0.35  |
| 1957~ 2016         | C5-C6  | 0.58 | 29.9  | 1957~ 2016          | 0.54 | 37+/22-               | 41+/19- <sup>**</sup> | 3.45 | 0.30  | 0.30  |
| 1958 ~ 1988        | P8-C7  | 0.59 | 15.38 | 1989 ~ 2016         | 0.57 | 21+/7- <sup>*</sup>   | 21+/6- <sup>**</sup>  | 2.55 | 0.34  | 0.26  |
|                    | P7-C6  | 0.66 | 22.8  |                     | 0.59 | 20+/8- <sup>*</sup>   | 17+/10-               | 2.98 | 0.16  | 0.06  |
| 1957~1986          | C5-C6  | 0.74 | 33.5  | 1987~2016           | 0.53 | 13+/16-               | 19+/11-               | 2.07 | -0.05 | -0.05 |
| 1989 ~ 2016        | P8-C7  | 0.57 | 12.8  | 1958 ~ 1988         | 0.59 | 22+/9- <sup>*</sup>   | 21+/9- <sup>*</sup>   | 2.64 | 0.37  | 0.32  |
|                    | P7-C6  | 0.59 | 13.77 |                     | 0.66 | 23+/8- <sup>*</sup>   | 22+/8- <sup>*</sup>   | 2.82 | 0.39  | 0.35  |
| 1987~2016          | C5-C6  | 0.53 | 10.7  | 1957~1986           | 0.74 | 23+/6- <sup>**</sup>  | 22+/8- <sup>**</sup>  | 2.52 | 0.33  | 0.33  |

P8-C7: August of the previous year to July of the current year. P7-C6: July of the previous year to June of the current year. C5-C6: May-June in the current year. r: correlation coefficient. F: significance test indicators for regression equations. ST: Sign test. FST: First-order sign test. RE: Error reduction. CE: Effective coefficient. PMT: Product mean test. <sup>\*\*</sup>p<0.01, <sup>\*</sup>p<0.05.

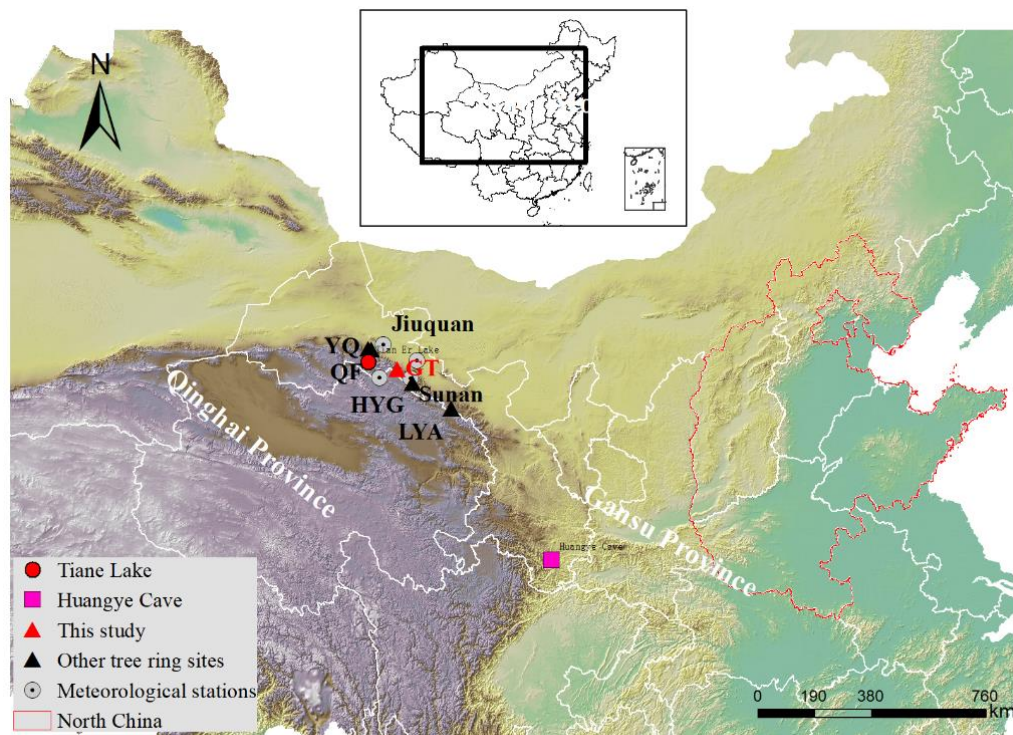

**Figure S1.** Locations of tree-ring based series and other proxy-based dry-wet series

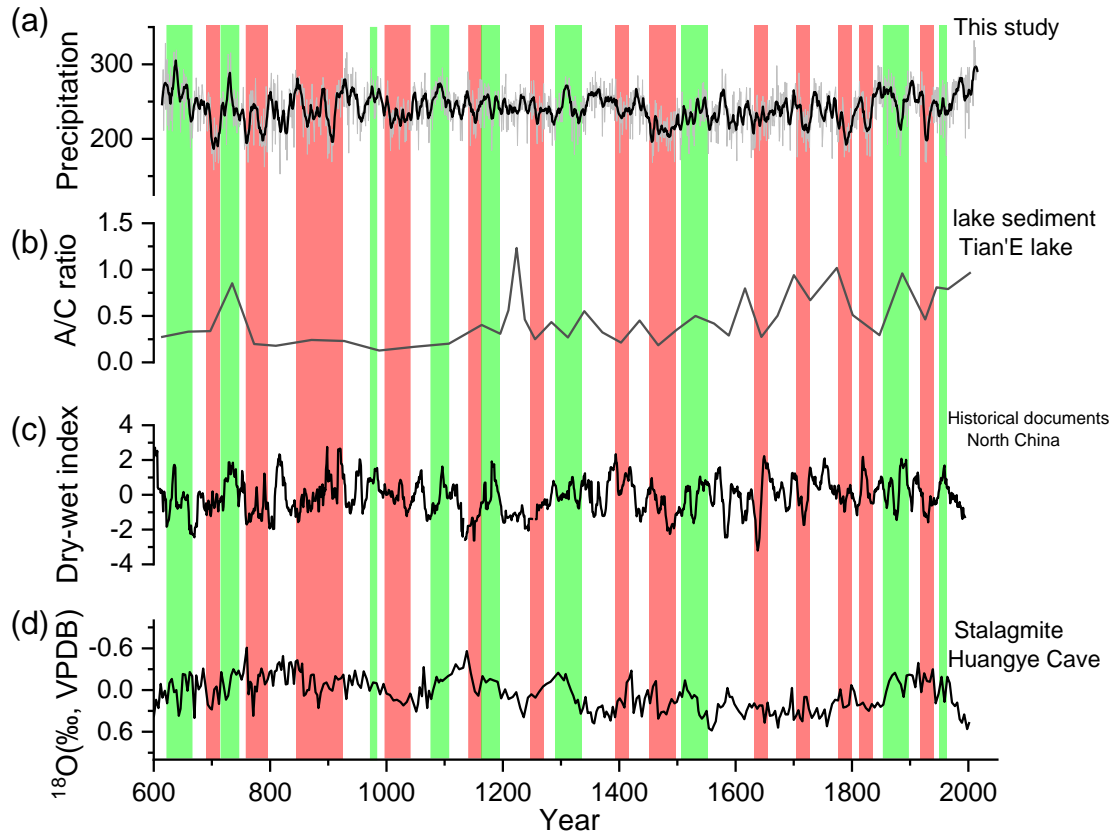

**Figure S2.** Comparison among our reconstruction presented in this paper (a) and other moisture-related series from the Jiuquan area (b. Zhang et al. 2018 [37]), northern China (c. Zheng et al. 2006 [38]), and Huangye Cave in central China (d. Tan et al. 2010 [39]). Red columns indicate spatially extensive drought periods; green columns indicate spatially extensive pluvial periods.
