# Supplementary material for: Precipitation Variations in the Central Qilian Mountains since the 7th Century and Regional Differences: Evidence from Tree-Ring Data
Source: MDPI journal article supplement (doi:10.3390/f15040624), 2024-03-29
Supplement: s1 [file s1]

Archive with 1 entries (1 files):
- forests-2902791-supplementary.pdf
